# Supplementary material
Source: Springer Nature journal article supplement (https://www.springermedizin.de/resource/supplementary/12894_2014_336_MOESM6_ESM.pdf/9513532)

**Before operation**

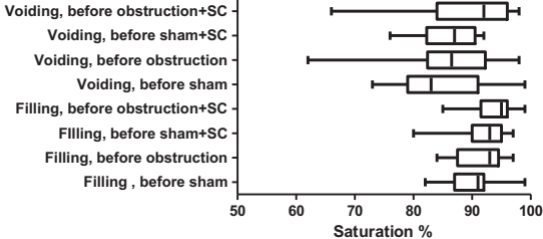

Supplement: MOESM6 [file 9513532]
